# Supplementary material
Source: Springer Nature journal article supplement (https://www.springermedizin.de/resource/supplementary/13045_2008_19_MOESM3_ESM.pdf/9660482)

**A****Absolute CD41+ cell count**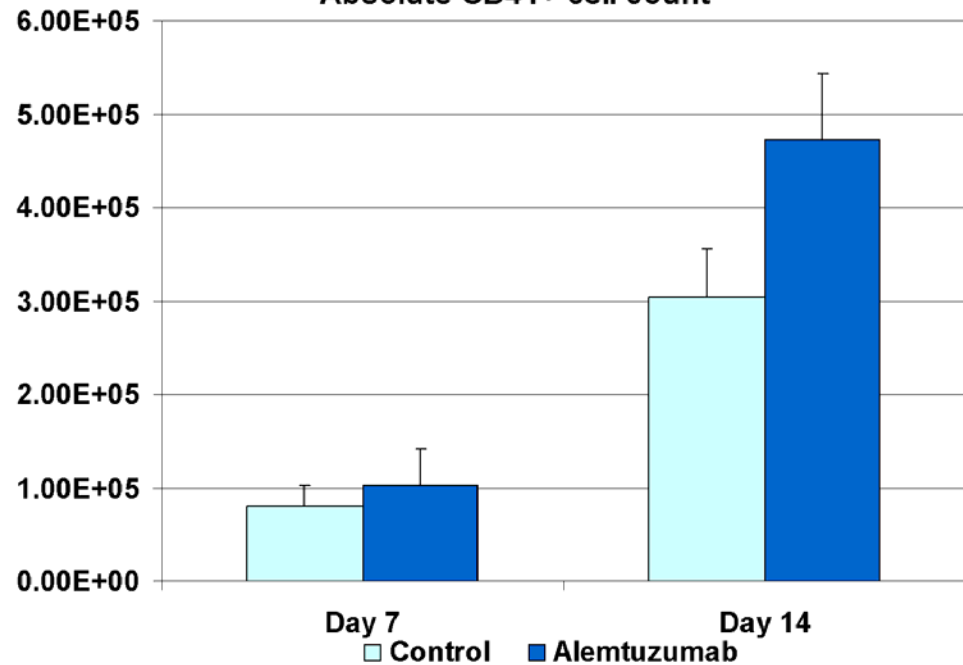**B****Relative CD41+ expansion fold for Alemtuzumab treated vs control condition**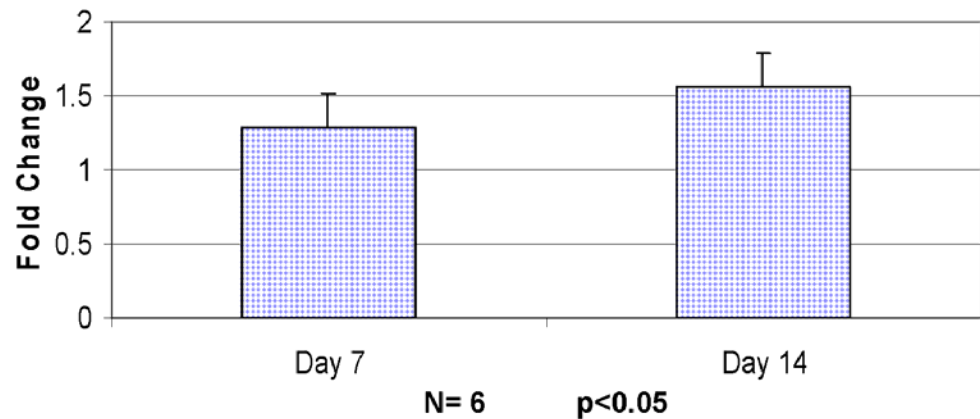

Supplement: MOESM3 [file 9660482]
